# Supplementary material for: The Deinococcus radiodurans DR1245 Protein, a DdrB Partner Homologous to YbjN Proteins and Reminiscent of Type III Secretion System Chaperones
Source: PLoS One. 2013 Feb 18;8(2):e56558. doi: 10.1371/journal.pone.0056558 (PMC3575483; doi:10.1371/journal.pone.0056558)
Supplement: Table S1 — List of peptides identified by tandem mass spectrometry and their characteristics. (XLSX) [file pone.0056558.s004.xlsx]

## Sheet: TABLE S1 avec base DR1245_02
Table S1. List of peptides identified and their characteristics (Home made database with corrected DR1245 sequence).
Sample	Reference	.DAT file	MS/MS query	m/z observed	z	Mr (experimental)	Mr (calculated)	Error (ppm)	MASCOT score	Start	Stop	-1	Peptide sequence	+1	Modifications	Miss-cleavages	R.T.	Query title	Accession
1	B12	F065051.dat	289	546.292	2	1090.57	1090.57	0.0586849	64.03	60	68	R	LEITCVTQK	T	Carbamidomethyl (C) [5]	0	976.487	ech_11-06-07_B12.1620.1620.2.dta	DR1245_02
1	B12	F065051.dat	379	575.273	2	1148.53	1148.53	0.142791	75.26	75	84	R	AEVAMMLNDR	N		0	1227.85	ech_11-06-07_B12.2169.2169.2.dta	DR1245_02
1	B12	F065051.dat	668	441.217	3	1320.63	1320.63	-0.0575484	41.99	74	84	R	RAEVAMMLNDR	N	Oxidation (M) [6]	1	790.522	ech_11-06-07_B12.1212.1212.3.dta	DR1245_02
1	B12	F065051.dat	792	473.899	3	1418.68	1418.68	-0.472271	24.74	75	86	R	AEVAMMLNDRNR	E		1	902.274	ech_11-06-07_B12.1458.1458.3.dta	DR1245_02
1	B12	F065051.dat	821	718.39	2	1434.76	1434.76	0.38055	90.06	1	13	-	METALLTLDTLAK	Y	Oxidation (M) [1]	0	2048.2	ech_11-06-07_B12.3629.3629.2.dta	DR1245_02
1	B12	F065051.dat	950	743.861	2	1485.71	1485.71	0.965871	59.06	19	31	K	EVQLDIEENGGQR	F		0	1078.76	ech_11-06-07_B12.1854.1854.2.dta	DR1245_02
1	B12	F065051.dat	1345	716.69	3	2147.05	2147.05	0.0950141	40.81	14	31	K	YLQEKEVQLDIEENGGQR	F		1	1300.25	ech_11-06-07_B12.2299.2299.3.dta	DR1245_02
1	B12	F065051.dat	1410	1105.01	2	2208.01	2208.01	0.710594	64.32	39	59	R	FEMGDAAVLVSVNDGPNNTSR	L	Oxidation (M) [3]	0	1524.38	ech_11-06-07_B12.2719.2719.2.dta	DR1245_02
1	B12	F065051.dat	286	546.292	2	1090.57	1090.57	-0.271418	29.18	60	68	R	LEITCVTQK	T	Carbamidomethyl (C) [5]	0	914.865	ech_11-06-07_B12.1486.1486.2.dta	DR1245_02
1	B12	F065051.dat	287	546.292	2	1090.57	1090.57	-0.271418	43.3	60	68	R	LEITCVTQK	T	Carbamidomethyl (C) [5]	0	916.029	ech_11-06-07_B12.1489.1489.2.dta	DR1245_02
1	B12	F065051.dat	288	546.292	2	1090.57	1090.57	-0.0513493	64.01	60	68	R	LEITCVTQK	T	Carbamidomethyl (C) [5]	0	977.908	ech_11-06-07_B12.1624.1624.2.dta	DR1245_02
1	B12	F065051.dat	380	575.274	2	1148.53	1148.53	0.682611	58.24	75	84	R	AEVAMMLNDR	N		0	1226.96	ech_11-06-07_B12.2167.2167.2.dta	DR1245_02
1	B12	F065051.dat	412	583.269	2	1164.52	1164.53	-3.13861	20.85	75	84	R	AEVAMMLNDR	N	Oxidation (M) [6]	0	880.344	ech_11-06-07_B12.1410.1410.2.dta	DR1245_02
1	B12	F065051.dat	413	583.27	2	1164.53	1164.53	-0.425065	27.97	75	84	R	AEVAMMLNDR	N	Oxidation (M) [5]	0	1085.21	ech_11-06-07_B12.1870.1870.2.dta	DR1245_02
1	B12	F065051.dat	414	583.271	2	1164.53	1164.53	-0.201799	60.43	75	84	R	AEVAMMLNDR	N	Oxidation (M) [6]	0	942.163	ech_11-06-07_B12.1548.1548.2.dta	DR1245_02
1	B12	F065051.dat	415	583.271	2	1164.53	1164.53	-0.0987526	67.97	75	84	R	AEVAMMLNDR	N	Oxidation (M) [6]	0	940.667	ech_11-06-07_B12.1544.1544.2.dta	DR1245_02
1	B12	F065051.dat	416	583.271	2	1164.53	1164.53	0.00429359	70.27	75	84	R	AEVAMMLNDR	N	Oxidation (M) [5]	0	1021.44	ech_11-06-07_B12.1719.1719.2.dta	DR1245_02
1	B12	F065051.dat	417	583.271	2	1164.53	1164.53	0.10734	24.14	75	84	R	AEVAMMLNDR	N	Oxidation (M) [6]	0	879.196	ech_11-06-07_B12.1407.1407.2.dta	DR1245_02
1	B12	F065051.dat	418	583.271	2	1164.53	1164.53	0.10734	67.27	75	84	R	AEVAMMLNDR	N	Oxidation (M) [5]	0	1022.64	ech_11-06-07_B12.1722.1722.2.dta	DR1245_02
1	B12	F065051.dat	419	583.271	2	1164.53	1164.53	1.15498	35.14	75	84	R	AEVAMMLNDR	N	Oxidation (M) [5]	0	1089.44	ech_11-06-07_B12.1881.1881.2.dta	DR1245_02
1	B12	F065051.dat	450	591.268	2	1180.52	1180.52	-0.147392	37.11	75	84	R	AEVAMMLNDR	N	Oxidation (M) [5], Oxidation (M) [6]	0	539.518	ech_11-06-07_B12.798.798.2.dta	DR1245_02
1	B12	F065051.dat	451	591.268	2	1180.52	1180.52	0.174499	38.71	75	84	R	AEVAMMLNDR	N	Oxidation (M) [5], Oxidation (M) [6]	0	978.506	ech_11-06-07_B12.1626.1626.2.dta	DR1245_02
1	B12	F065051.dat	452	591.268	2	1180.52	1180.52	0.276149	38.18	75	84	R	AEVAMMLNDR	N	Oxidation (M) [5], Oxidation (M) [6]	0	1100.6	ech_11-06-07_B12.1910.1910.2.dta	DR1245_02
1	B12	F065051.dat	453	591.268	2	1180.52	1180.52	0.377799	31.41	75	84	R	AEVAMMLNDR	N	Oxidation (M) [5], Oxidation (M) [6]	0	979.322	ech_11-06-07_B12.1628.1628.2.dta	DR1245_02
1	B12	F065051.dat	454	591.268	2	1180.52	1180.52	0.682749	43.38	75	84	R	AEVAMMLNDR	N	Oxidation (M) [5], Oxidation (M) [6]	0	543.084	ech_11-06-07_B12.804.804.2.dta	DR1245_02
1	B12	F065051.dat	455	591.268	2	1180.52	1180.52	0.682749	48.69	75	84	R	AEVAMMLNDR	N	Oxidation (M) [5], Oxidation (M) [6]	0	1101.78	ech_11-06-07_B12.1913.1913.2.dta	DR1245_02
1	B12	F065051.dat	659	435.885	3	1304.63	1304.63	-0.173995	21.06	74	84	R	RAEVAMMLNDR	N		1	964.127	ech_11-06-07_B12.1597.1597.3.dta	DR1245_02
1	B12	F065051.dat	658	435.884	3	1304.63	1304.63	-1.87562	24.95	74	84	R	RAEVAMMLNDR	N		1	962.989	ech_11-06-07_B12.1594.1594.3.dta	DR1245_02
1	B12	F065051.dat	661	653.324	2	1304.63	1304.63	1.04167	28.98	74	84	R	RAEVAMMLNDR	N		1	977.069	ech_11-06-07_B12.1622.1622.2.dta	DR1245_02
1	B12	F065051.dat	670	441.217	3	1320.63	1320.63	0.351348	32.01	74	84	R	RAEVAMMLNDR	N	Oxidation (M) [6]	1	788.958	ech_11-06-07_B12.1208.1208.3.dta	DR1245_02
1	B12	F065051.dat	795	710.391	2	1418.77	1418.77	-0.616732	45.82	1	13	-	METALLTLDTLAK	Y		0	2178.25	ech_11-06-07_B12.3853.3853.2.dta	DR1245_02
1	B12	F065051.dat	810	718.389	2	1434.76	1434.76	-0.469764	16.25	1	13	-	METALLTLDTLAK	Y	Oxidation (M) [1]	0	2216.76	ech_11-06-07_B12.3912.3912.2.dta	DR1245_02
1	B12	F065051.dat	811	479.262	3	1434.76	1434.76	-0.250912	26.06	1	13	-	METALLTLDTLAK	Y	Oxidation (M) [1]	0	1525.62	ech_11-06-07_B12.2722.2722.3.dta	DR1245_02
1	B12	F065051.dat	812	479.262	3	1434.76	1434.76	-0.250912	40.78	1	13	-	METALLTLDTLAK	Y	Oxidation (M) [1]	0	1524.76	ech_11-06-07_B12.2720.2720.3.dta	DR1245_02
1	B12	F065051.dat	813	718.389	2	1434.76	1434.76	-0.0515764	16.72	1	13	-	METALLTLDTLAK	Y	Oxidation (M) [1]	0	2223.12	ech_11-06-07_B12.3924.3924.2.dta	DR1245_02
1	B12	F065051.dat	814	718.389	2	1434.76	1434.76	-0.0515764	45.76	1	13	-	METALLTLDTLAK	Y	Oxidation (M) [1]	0	2110.37	ech_11-06-07_B12.3738.3738.2.dta	DR1245_02
1	B12	F065051.dat	816	718.389	2	1434.76	1434.76	0.032061	62.21	1	13	-	METALLTLDTLAK	Y	Oxidation (M) [1]	0	2109.5	ech_11-06-07_B12.3736.3736.2.dta	DR1245_02
1	B12	F065051.dat	796	710.392	2	1418.77	1418.77	0.66607	66.32	1	13	-	METALLTLDTLAK	Y		0	2179.08	ech_11-06-07_B12.3855.3855.2.dta	DR1245_02
1	B12	F065051.dat	818	718.389	2	1434.76	1434.76	0.115698	65.34	1	13	-	METALLTLDTLAK	Y	Oxidation (M) [1]	0	1774.62	ech_11-06-07_B12.3148.3148.2.dta	DR1245_02
1	B12	F065051.dat	819	479.262	3	1434.76	1434.76	0.125456	40.32	1	13	-	METALLTLDTLAK	Y	Oxidation (M) [1]	0	1421.43	ech_11-06-07_B12.2539.2539.3.dta	DR1245_02
1	B12	F065051.dat	817	718.389	2	1434.76	1434.76	0.032061	72.55	1	13	-	METALLTLDTLAK	Y	Oxidation (M) [1]	0	1773.05	ech_11-06-07_B12.3144.3144.2.dta	DR1245_02
1	B12	F065051.dat	820	718.389	2	1434.76	1434.76	0.199336	73.75	1	13	-	METALLTLDTLAK	Y	Oxidation (M) [1]	0	2049.02	ech_11-06-07_B12.3631.3631.2.dta	DR1245_02
1	B12	F065051.dat	822	718.39	2	1434.76	1434.76	0.464188	79.27	1	13	-	METALLTLDTLAK	Y	Oxidation (M) [1]	0	1987.37	ech_11-06-07_B12.3514.3514.2.dta	DR1245_02
1	B12	F065051.dat	823	718.39	2	1434.76	1434.76	0.464188	60	1	13	-	METALLTLDTLAK	Y	Oxidation (M) [1]	0	1426.36	ech_11-06-07_B12.2549.2549.2.dta	DR1245_02
1	B12	F065051.dat	824	718.39	2	1434.76	1434.76	0.464188	38.99	1	13	-	METALLTLDTLAK	Y	Oxidation (M) [1]	0	1425.52	ech_11-06-07_B12.2547.2547.2.dta	DR1245_02
1	B12	F065051.dat	826	718.39	2	1434.76	1434.76	0.631463	63.69	1	13	-	METALLTLDTLAK	Y	Oxidation (M) [1]	0	1986.16	ech_11-06-07_B12.3511.3511.2.dta	DR1245_02
1	B12	F065051.dat	827	479.262	3	1434.77	1434.76	0.836375	15.31	1	13	-	METALLTLDTLAK	Y	Oxidation (M) [1]	0	1420.63	ech_11-06-07_B12.2537.2537.3.dta	DR1245_02
1	B12	F065051.dat	828	718.39	2	1434.77	1434.76	1.23086	36.28	1	13	-	METALLTLDTLAK	Y	Oxidation (M) [1]	0	2172.51	ech_11-06-07_B12.3841.3841.2.dta	DR1245_02
1	B12	F065051.dat	947	496.242	3	1485.7	1485.71	-0.741062	30.07	19	31	K	EVQLDIEENGGQR	F		0	1086.07	ech_11-06-07_B12.1872.1872.3.dta	DR1245_02
1	B12	F065051.dat	949	743.86	2	1485.71	1485.71	-0.0975967	49.73	19	31	K	EVQLDIEENGGQR	F		0	1077.89	ech_11-06-07_B12.1852.1852.2.dta	DR1245_02
1	B12	F065051.dat	1346	716.691	3	2147.05	2147.05	0.430358	33.03	14	31	K	YLQEKEVQLDIEENGGQR	F		1	1299.33	ech_11-06-07_B12.2297.2297.3.dta	DR1245_02
1	B12	F065051.dat	1399	1097.02	2	2192.02	2192.02	-0.160583	21.83	39	59	R	FEMGDAAVLVSVNDGPNNTSR	L		0	1985.31	ech_11-06-07_B12.3509.3509.2.dta	DR1245_02
1	B12	F065051.dat	1398	1097.01	2	2192.01	2192.02	-1.83028	22.36	39	59	R	FEMGDAAVLVSVNDGPNNTSR	L		0	1981.96	ech_11-06-07_B12.3503.3503.2.dta	DR1245_02
1	B12	F065051.dat	1411	1105.02	2	2208.02	2208.01	2.03305	50.91	39	59	R	FEMGDAAVLVSVNDGPNNTSR	L	Oxidation (M) [3]	0	1523.18	ech_11-06-07_B12.2716.2716.2.dta	DR1245_02
1	B12	F065051.dat	1413	737.013	3	2208.02	2208.01	2.46964	17.03	39	59	R	FEMGDAAVLVSVNDGPNNTSR	L	Oxidation (M) [3]	0	1513.54	ech_11-06-07_B12.2700.2700.3.dta	DR1245_02
Sample	Reference	.DAT file	MS/MS query	m/z observed	z	Mr (experimental)	Mr (calculated)	Error (ppm)	MASCOT score	Start	Stop	-1	Peptide sequence	+1	Modifications	Miss-cleavages	R.T.	Query title	Accession
2	TUBE A	F065050.dat	557	546.292	2	1090.57	1090.57	0.168719	26.14	60	68	R	LEITCVTQK	T	Carbamidomethyl (C) [5]	0	940.076	ech_dec-07_tubeA.1615.1615.2.dta	DR1245_02
2	TUBE A	F065050.dat	1395	718.39	2	1434.76	1434.76	0.38055	75.61	1	13	-	METALLTLDTLAK	Y	Oxidation (M) [1]	0	2004.49	ech_dec-07_tubeA.4267.4267.2.dta	DR1245_02
2	TUBE A	F065050.dat	1500	743.861	2	1485.71	1485.71	0.804331	100.56	19	31	K	EVQLDIEENGGQR	F		0	1089.49	ech_dec-07_tubeA.1996.1996.2.dta	DR1245_02
2	TUBE A	F065050.dat	2627	716.691	3	2147.05	2147.05	0.262686	35.52	14	31	K	YLQEKEVQLDIEENGGQR	F		1	1309.72	ech_dec-07_tubeA.2546.2546.3.dta	DR1245_02
2	TUBE A	F065050.dat	556	546.292	2	1090.57	1090.57	-0.161384	25.23	60	68	R	LEITCVTQK	T	Carbamidomethyl (C) [5]	0	938.545	ech_dec-07_tubeA.1611.1611.2.dta	DR1245_02
2	TUBE A	F065050.dat	1359	710.392	2	1418.77	1418.77	0.412329	51.23	1	13	-	METALLTLDTLAK	Y		0	2189.86	ech_dec-07_tubeA.4713.4713.2.dta	DR1245_02
2	TUBE A	F065050.dat	1360	710.392	2	1418.77	1418.77	0.835231	54.24	1	13	-	METALLTLDTLAK	Y		0	2191.48	ech_dec-07_tubeA.4717.4717.2.dta	DR1245_02
2	TUBE A	F065050.dat	1394	718.389	2	1434.76	1434.76	0.199336	64.11	1	13	-	METALLTLDTLAK	Y	Oxidation (M) [1]	0	2003.31	ech_dec-07_tubeA.4264.4264.2.dta	DR1245_02
2	TUBE A	F065050.dat	1498	496.243	3	1485.71	1485.71	-0.0141347	22.9	19	31	K	EVQLDIEENGGQR	F		0	1099.28	ech_dec-07_tubeA.2021.2021.3.dta	DR1245_02
2	TUBE A	F065050.dat	1497	496.242	3	1485.7	1485.71	-0.862216	40.18	19	31	K	EVQLDIEENGGQR	F		0	1103.97	ech_dec-07_tubeA.2033.2033.3.dta	DR1245_02
2	TUBE A	F065050.dat	1499	743.86	2	1485.71	1485.71	0.225482	67.96	19	31	K	EVQLDIEENGGQR	F		0	1091.03	ech_dec-07_tubeA.2000.2000.2.dta	DR1245_02
2	TUBE A	F065050.dat	2626	716.69	3	2147.05	2147.05	-0.421974	18.98	14	31	K	YLQEKEVQLDIEENGGQR	F		1	1307.68	ech_dec-07_tubeA.2541.2541.3.dta	DR1245_02
Sample	Reference	.DAT file	MS/MS query	m/z observed	z	Mr (experimental)	Mr (calculated)	Error (ppm)	MASCOT score	Start	Stop	-1	Peptide sequence	+1	Modifications	Miss-cleavages	R.T.	Query title	Accession
3	bande 8	F065049.dat	600	546.292	2	1090.57	1090.57	-0.381452	29	60	68	R	LEITCVTQK	T	Carbamidomethyl (C) [5]	0	948.781	ech_21-06-07_bd8.1655.1655.2.dta	DR1245_02
3	bande 8	F065049.dat	1366	718.389	2	1434.76	1434.76	-0.386126	77.04	1	13	-	METALLTLDTLAK	Y	Oxidation (M) [1]	0	2010.81	ech_21-06-07_bd8.4090.4090.2.dta	DR1245_02
3	bande 8	F065049.dat	1450	743.861	2	1485.71	1485.71	0.804331	70.37	19	31	K	EVQLDIEENGGQR	F		0	1104.68	ech_21-06-07_bd8.2039.2039.2.dta	DR1245_02
3	bande 8	F065049.dat	1977	716.691	3	2147.05	2147.05	1.3805	30.94	14	31	K	YLQEKEVQLDIEENGGQR	F		1	1315.56	ech_21-06-07_bd8.2499.2499.3.dta	DR1245_02
3	bande 8	F065049.dat	599	546.291	2	1090.57	1090.57	-1.06	20.62	60	68	R	LEITCVTQK	T	Carbamidomethyl (C) [5]	0	947.295	ech_21-06-07_bd8.1651.1651.2.dta	DR1245_02
3	bande 8	F065049.dat	1367	718.39	2	1434.76	1434.76	0.464188	64.36	1	13	-	METALLTLDTLAK	Y	Oxidation (M) [1]	0	2011.93	ech_21-06-07_bd8.4093.4093.2.dta	DR1245_02
3	bande 8	F065049.dat	1449	743.86	2	1485.71	1485.71	-0.514907	62.32	19	31	K	EVQLDIEENGGQR	F		0	1103.56	ech_21-06-07_bd8.2036.2036.2.dta	DR1245_02

## Sheet: TABLE S1 avec base NCBI-Nr
Table S1. List of peptides identified and their characteristics (NCBI nr).
Sample	Reference	.DAT file	MS/MS query	m/z observed	z	Mr (experimental)	Mr (calculated)	Error (ppm)	MASCOT score	Start	Stop	-1	Peptide sequence	+1	Modifications	Miss-cleavages	R.T.	Query title	Accession	Description
1	B12	F065051.dat	289	546.292	2	1090.57	1090.57	0.0586849	64.03	72	80	R	LEITCVTQK	T	Carbamidomethyl (C) [5]	0	976.487	ech_11-06-07_B12.1620.1620.2.dta	gi|15806264	gb|AAF10822.1|AE001972_12 hypothetical protein DR_1245 [Deinococcus radiodurans R1]
1	B12	F065051.dat	379	575.273	2	1148.53	1148.53	0.142791	75.26	87	96	R	AEVAMMLNDR	N		0	1227.85	ech_11-06-07_B12.2169.2169.2.dta	gi|15806264	gb|AAF10822.1|AE001972_12 hypothetical protein DR_1245 [Deinococcus radiodurans R1]
1	B12	F065051.dat	950	743.861	2	1485.71	1485.71	0.965871	59.06	31	43	K	EVQLDIEENGGQR	F		0	1078.76	ech_11-06-07_B12.1854.1854.2.dta	gi|15806264	gb|AAF10822.1|AE001972_12 hypothetical protein DR_1245 [Deinococcus radiodurans R1]
1	B12	F065051.dat	1410	1105.01	2	2208.01	2208.01	0.710594	64.32	51	71	R	FEMGDAAVLVSVNDGPNNTSR	L	Oxidation (M) [3]	0	1524.38	ech_11-06-07_B12.2719.2719.2.dta	gi|15806264	gb|AAF10822.1|AE001972_12 hypothetical protein DR_1245 [Deinococcus radiodurans R1]
1	B12	F065051.dat	288	546.292	2	1090.57	1090.57	-0.0513493	64.01	72	80	R	LEITCVTQK	T	Carbamidomethyl (C) [5]	0	977.908	ech_11-06-07_B12.1624.1624.2.dta	gi|15806264	gb|AAF10822.1|AE001972_12 hypothetical protein DR_1245 [Deinococcus radiodurans R1]
1	B12	F065051.dat	380	575.274	2	1148.53	1148.53	0.682611	58.24	87	96	R	AEVAMMLNDR	N		0	1226.96	ech_11-06-07_B12.2167.2167.2.dta	gi|15806264	gb|AAF10822.1|AE001972_12 hypothetical protein DR_1245 [Deinococcus radiodurans R1]
1	B12	F065051.dat	414	583.271	2	1164.53	1164.53	-0.201799	60.43	87	96	R	AEVAMMLNDR	N	Oxidation (M) [6]	0	942.163	ech_11-06-07_B12.1548.1548.2.dta	gi|15806264	gb|AAF10822.1|AE001972_12 hypothetical protein DR_1245 [Deinococcus radiodurans R1]
1	B12	F065051.dat	415	583.271	2	1164.53	1164.53	-0.0987526	67.97	87	96	R	AEVAMMLNDR	N	Oxidation (M) [6]	0	940.667	ech_11-06-07_B12.1544.1544.2.dta	gi|15806264	gb|AAF10822.1|AE001972_12 hypothetical protein DR_1245 [Deinococcus radiodurans R1]
1	B12	F065051.dat	416	583.271	2	1164.53	1164.53	0.00429359	70.27	87	96	R	AEVAMMLNDR	N	Oxidation (M) [5]	0	1021.44	ech_11-06-07_B12.1719.1719.2.dta	gi|15806264	gb|AAF10822.1|AE001972_12 hypothetical protein DR_1245 [Deinococcus radiodurans R1]
1	B12	F065051.dat	418	583.271	2	1164.53	1164.53	0.10734	67.27	87	96	R	AEVAMMLNDR	N	Oxidation (M) [5]	0	1022.64	ech_11-06-07_B12.1722.1722.2.dta	gi|15806264	gb|AAF10822.1|AE001972_12 hypothetical protein DR_1245 [Deinococcus radiodurans R1]
1	B12	F065051.dat	454	591.268	2	1180.52	1180.52	0.682749	43.38	87	96	R	AEVAMMLNDR	N	Oxidation (M) [5], Oxidation (M) [6]	0	543.084	ech_11-06-07_B12.804.804.2.dta	gi|15806264	gb|AAF10822.1|AE001972_12 hypothetical protein DR_1245 [Deinococcus radiodurans R1]
1	B12	F065051.dat	455	591.268	2	1180.52	1180.52	0.682749	48.69	87	96	R	AEVAMMLNDR	N	Oxidation (M) [5], Oxidation (M) [6]	0	1101.78	ech_11-06-07_B12.1913.1913.2.dta	gi|15806264	gb|AAF10822.1|AE001972_12 hypothetical protein DR_1245 [Deinococcus radiodurans R1]
1	B12	F065051.dat	949	743.86	2	1485.71	1485.71	-0.0975967	49.73	31	43	K	EVQLDIEENGGQR	F		0	1077.89	ech_11-06-07_B12.1852.1852.2.dta	gi|15806264	gb|AAF10822.1|AE001972_12 hypothetical protein DR_1245 [Deinococcus radiodurans R1]
1	B12	F065051.dat	1411	1105.02	2	2208.02	2208.01	2.03305	50.91	51	71	R	FEMGDAAVLVSVNDGPNNTSR	L	Oxidation (M) [3]	0	1523.18	ech_11-06-07_B12.2716.2716.2.dta	gi|15806264	gb|AAF10822.1|AE001972_12 hypothetical protein DR_1245 [Deinococcus radiodurans R1]
1	B12	F065051.dat	1001	753.904	2	1505.79	1505.79	1.17214	75.75	1	13	-	MLQIEFITDLGAR	V		0	2530.25	ech_11-06-07_B12.4395.4395.2.dta	gi|298351859	tpg|DAA06535.1| TPA_exp: single-stranded DNA-binding protein [Deinococcus radiodurans R1]
1	B12	F065051.dat	1106	784.902	2	1567.79	1567.79	0.293407	75.5	119	132	K	ADGDIEYVSLAIFR	G		0	2572.74	ech_11-06-07_B12.4460.4460.2.dta	gi|298351859	tpg|DAA06535.1| TPA_exp: single-stranded DNA-binding protein [Deinococcus radiodurans R1]
1	B12	F065051.dat	1272	913.47	2	1824.92	1824.93	-0.604408	61.27	117	132	R	EKADGDIEYVSLAIFR	G		1	2248.11	ech_11-06-07_B12.3967.3967.2.dta	gi|298351859	tpg|DAA06535.1| TPA_exp: single-stranded DNA-binding protein [Deinococcus radiodurans R1]
1	B12	F065051.dat	1045	761.901	2	1521.79	1521.79	0.240507	51.74	1	13	-	MLQIEFITDLGAR	V	Oxidation (M) [1]	0	2345.48	ech_11-06-07_B12.4126.4126.2.dta	gi|298351859	tpg|DAA06535.1| TPA_exp: single-stranded DNA-binding protein [Deinococcus radiodurans R1]
1	B12	F065051.dat	1046	761.901	2	1521.79	1521.79	0.319362	67.38	1	13	-	MLQIEFITDLGAR	V	Oxidation (M) [1]	0	2344.64	ech_11-06-07_B12.4124.4124.2.dta	gi|298351859	tpg|DAA06535.1| TPA_exp: single-stranded DNA-binding protein [Deinococcus radiodurans R1]
1	B12	F065051.dat	1108	784.902	2	1567.79	1567.79	0.995032	46.38	119	132	K	ADGDIEYVSLAIFR	G		0	2571.89	ech_11-06-07_B12.4458.4458.2.dta	gi|298351859	tpg|DAA06535.1| TPA_exp: single-stranded DNA-binding protein [Deinococcus radiodurans R1]
1	B12	F065051.dat	1277	913.471	2	1824.93	1824.93	1.3354	45.53	117	132	R	EKADGDIEYVSLAIFR	G		1	2250.16	ech_11-06-07_B12.3972.3972.2.dta	gi|298351859	tpg|DAA06535.1| TPA_exp: single-stranded DNA-binding protein [Deinococcus radiodurans R1]
1	B12	F065051.dat	289	546.292	2	1090.57	1090.57	0.0586849	64.03	60	68	R	LEITCVTQK	Q	Carbamidomethyl (C) [5]	0	976.487	ech_11-06-07_B12.1620.1620.2.dta	gi|355154308	gb|ACO46080.2| conserved hypothetical protein [Deinococcus deserti VCD115]
1	B12	F065051.dat	821	718.39	2	1434.76	1434.76	0.38055	90.06	1	13	-	METALLTLDTLAK	Y	Oxidation (M) [1]	0	2048.2	ech_11-06-07_B12.3629.3629.2.dta	gi|355154308	gb|ACO46080.2| conserved hypothetical protein [Deinococcus deserti VCD115]
1	B12	F065051.dat	1410	1105.01	2	2208.01	2208.01	0.710594	64.32	39	59	R	FEMGDAAVLVSVNDGPNNTSR	L	Oxidation (M) [3]	0	1524.38	ech_11-06-07_B12.2719.2719.2.dta	gi|355154308	gb|ACO46080.2| conserved hypothetical protein [Deinococcus deserti VCD115]
1	B12	F065051.dat	288	546.292	2	1090.57	1090.57	-0.0513493	64.01	60	68	R	LEITCVTQK	Q	Carbamidomethyl (C) [5]	0	977.908	ech_11-06-07_B12.1624.1624.2.dta	gi|355154308	gb|ACO46080.2| conserved hypothetical protein [Deinococcus deserti VCD115]
1	B12	F065051.dat	795	710.391	2	1418.77	1418.77	-0.616732	45.82	1	13	-	METALLTLDTLAK	Y		0	2178.25	ech_11-06-07_B12.3853.3853.2.dta	gi|355154308	gb|ACO46080.2| conserved hypothetical protein [Deinococcus deserti VCD115]
1	B12	F065051.dat	814	718.389	2	1434.76	1434.76	-0.0515764	45.76	1	13	-	METALLTLDTLAK	Y	Oxidation (M) [1]	0	2110.37	ech_11-06-07_B12.3738.3738.2.dta	gi|355154308	gb|ACO46080.2| conserved hypothetical protein [Deinococcus deserti VCD115]
1	B12	F065051.dat	816	718.389	2	1434.76	1434.76	0.032061	62.21	1	13	-	METALLTLDTLAK	Y	Oxidation (M) [1]	0	2109.5	ech_11-06-07_B12.3736.3736.2.dta	gi|355154308	gb|ACO46080.2| conserved hypothetical protein [Deinococcus deserti VCD115]
1	B12	F065051.dat	796	710.392	2	1418.77	1418.77	0.66607	66.32	1	13	-	METALLTLDTLAK	Y		0	2179.08	ech_11-06-07_B12.3855.3855.2.dta	gi|355154308	gb|ACO46080.2| conserved hypothetical protein [Deinococcus deserti VCD115]
1	B12	F065051.dat	818	718.389	2	1434.76	1434.76	0.115698	65.34	1	13	-	METALLTLDTLAK	Y	Oxidation (M) [1]	0	1774.62	ech_11-06-07_B12.3148.3148.2.dta	gi|355154308	gb|ACO46080.2| conserved hypothetical protein [Deinococcus deserti VCD115]
1	B12	F065051.dat	817	718.389	2	1434.76	1434.76	0.032061	72.55	1	13	-	METALLTLDTLAK	Y	Oxidation (M) [1]	0	1773.05	ech_11-06-07_B12.3144.3144.2.dta	gi|355154308	gb|ACO46080.2| conserved hypothetical protein [Deinococcus deserti VCD115]
1	B12	F065051.dat	820	718.389	2	1434.76	1434.76	0.199336	73.75	1	13	-	METALLTLDTLAK	Y	Oxidation (M) [1]	0	2049.02	ech_11-06-07_B12.3631.3631.2.dta	gi|355154308	gb|ACO46080.2| conserved hypothetical protein [Deinococcus deserti VCD115]
1	B12	F065051.dat	822	718.39	2	1434.76	1434.76	0.464188	79.27	1	13	-	METALLTLDTLAK	Y	Oxidation (M) [1]	0	1987.37	ech_11-06-07_B12.3514.3514.2.dta	gi|355154308	gb|ACO46080.2| conserved hypothetical protein [Deinococcus deserti VCD115]
1	B12	F065051.dat	823	718.39	2	1434.76	1434.76	0.464188	60	1	13	-	METALLTLDTLAK	Y	Oxidation (M) [1]	0	1426.36	ech_11-06-07_B12.2549.2549.2.dta	gi|355154308	gb|ACO46080.2| conserved hypothetical protein [Deinococcus deserti VCD115]
1	B12	F065051.dat	826	718.39	2	1434.76	1434.76	0.631463	63.69	1	13	-	METALLTLDTLAK	Y	Oxidation (M) [1]	0	1986.16	ech_11-06-07_B12.3511.3511.2.dta	gi|355154308	gb|ACO46080.2| conserved hypothetical protein [Deinococcus deserti VCD115]
1	B12	F065051.dat	1411	1105.02	2	2208.02	2208.01	2.03305	50.91	39	59	R	FEMGDAAVLVSVNDGPNNTSR	L	Oxidation (M) [3]	0	1523.18	ech_11-06-07_B12.2716.2716.2.dta	gi|355154308	gb|ACO46080.2| conserved hypothetical protein [Deinococcus deserti VCD115]
1	B12	F065051.dat	1092	772.908	2	1543.8	1543.8	0.896489	50.64	80	94	R	VGGSTYQVPVEVGPR	R		0	1322.38	ech_11-06-07_B12.2349.2349.2.dta	gi|15805335	gb|AAF09886.1|AE001891_5 ribosomal protein S7 [Deinococcus radiodurans R1]
1	B12	F065051.dat	1047	762.393	2	1522.77	1522.77	3.21783	49.75	87	99	R	STNSLELMESRLK	L	Oxidation (M) [8]	1	2454.66	ech_11-06-07_B12.4283.4283.2.dta	gi|365886621	emb|CCD98068.1| conserved hypothetical protein [Bradyrhizobium sp. STM 3809]
1	B12	F065051.dat	1030	758.368	2	1514.72	1514.73	-2.38855	46.83	12	24	R	LDQLDLNGSYSYK	D		0	1368.22	ech_11-06-07_B12.2451.2451.2.dta	gi|240948932	gb|EER47358.1| hypothetical protein AM305_08524 [Actinobacillus minor NM305]
Sample	Reference	.DAT file	MS/MS query	m/z observed	z	Mr (experimental)	Mr (calculated)	Error (ppm)	MASCOT score	Start	Stop	-1	Peptide sequence	+1	Modifications	Miss-cleavages	R.T.	Query title	Accession	Description
2	TUBE A	F065050.dat	993	422.554	3	1264.64	1264.64	0.20401	67.24	68	78	K	SPEGEELVIHR	G		0	924.651	ech_dec-07_tubeA.1576.1576.3.dta	gi|298351859	tpg|DAA06535.1| TPA_exp: single-stranded DNA-binding protein [Deinococcus radiodurans R1]
2	TUBE A	F065050.dat	1587	761.9	2	1521.79	1521.79	0.00394274	89.75	1	13	-	MLQIEFITDLGAR	V	Oxidation (M) [1]	0	2361.85	ech_dec-07_tubeA.5125.5125.2.dta	gi|298351859	tpg|DAA06535.1| TPA_exp: single-stranded DNA-binding protein [Deinococcus radiodurans R1]
2	TUBE A	F065050.dat	1707	784.902	2	1567.79	1567.79	0.76541	77.85	119	132	K	ADGDIEYVSLAIFR	G		0	2574.97	ech_dec-07_tubeA.5598.5598.2.dta	gi|298351859	tpg|DAA06535.1| TPA_exp: single-stranded DNA-binding protein [Deinococcus radiodurans R1]
2	TUBE A	F065050.dat	2217	913.471	2	1824.93	1824.93	0.732633	95.04	117	132	R	EKADGDIEYVSLAIFR	G		1	2247.13	ech_dec-07_tubeA.4851.4851.2.dta	gi|298351859	tpg|DAA06535.1| TPA_exp: single-stranded DNA-binding protein [Deinococcus radiodurans R1]
2	TUBE A	F065050.dat	988	633.328	2	1264.64	1264.64	-0.328947	48.41	68	78	K	SPEGEELVIHR	G		0	808.562	ech_dec-07_tubeA.1289.1289.2.dta	gi|298351859	tpg|DAA06535.1| TPA_exp: single-stranded DNA-binding protein [Deinococcus radiodurans R1]
2	TUBE A	F065050.dat	990	422.554	3	1264.64	1264.64	-0.0806553	58.38	68	78	K	SPEGEELVIHR	G		0	861.304	ech_dec-07_tubeA.1420.1420.3.dta	gi|298351859	tpg|DAA06535.1| TPA_exp: single-stranded DNA-binding protein [Deinococcus radiodurans R1]
2	TUBE A	F065050.dat	994	422.554	3	1264.64	1264.64	0.20401	48.64	68	78	K	SPEGEELVIHR	G		0	859.811	ech_dec-07_tubeA.1416.1416.3.dta	gi|298351859	tpg|DAA06535.1| TPA_exp: single-stranded DNA-binding protein [Deinococcus radiodurans R1]
2	TUBE A	F065050.dat	996	633.328	2	1264.64	1264.64	0.240384	51.14	68	78	K	SPEGEELVIHR	G		0	809.751	ech_dec-07_tubeA.1292.1292.2.dta	gi|298351859	tpg|DAA06535.1| TPA_exp: single-stranded DNA-binding protein [Deinococcus radiodurans R1]
2	TUBE A	F065050.dat	1549	753.903	2	1505.79	1505.79	0.521321	61.58	1	13	-	MLQIEFITDLGAR	V		0	2530.76	ech_dec-07_tubeA.5501.5501.2.dta	gi|298351859	tpg|DAA06535.1| TPA_exp: single-stranded DNA-binding protein [Deinococcus radiodurans R1]
2	TUBE A	F065050.dat	1550	753.903	2	1505.79	1505.79	0.601013	89.65	1	13	-	MLQIEFITDLGAR	V		0	2532.28	ech_dec-07_tubeA.5505.5505.2.dta	gi|298351859	tpg|DAA06535.1| TPA_exp: single-stranded DNA-binding protein [Deinococcus radiodurans R1]
2	TUBE A	F065050.dat	1588	761.901	2	1521.79	1521.79	0.884487	59.29	1	13	-	MLQIEFITDLGAR	V	Oxidation (M) [1]	0	2361.04	ech_dec-07_tubeA.5123.5123.2.dta	gi|298351859	tpg|DAA06535.1| TPA_exp: single-stranded DNA-binding protein [Deinococcus radiodurans R1]
2	TUBE A	F065050.dat	1706	784.902	2	1567.79	1567.79	0.293407	75.16	119	132	K	ADGDIEYVSLAIFR	G		0	2574.13	ech_dec-07_tubeA.5596.5596.2.dta	gi|298351859	tpg|DAA06535.1| TPA_exp: single-stranded DNA-binding protein [Deinococcus radiodurans R1]
2	TUBE A	F065050.dat	2219	913.471	2	1824.93	1824.93	0.809348	70.4	117	132	R	EKADGDIEYVSLAIFR	G		1	2245.92	ech_dec-07_tubeA.4848.4848.2.dta	gi|298351859	tpg|DAA06535.1| TPA_exp: single-stranded DNA-binding protein [Deinococcus radiodurans R1]
2	TUBE A	F065050.dat	1311	699.394	2	1396.77	1396.77	0.805429	60.86	54	65	R	LLIEPFLEGNPR	C		0	2146.33	ech_dec-07_tubeA.4604.4604.2.dta	gi|15805048	gb|AAF09599.1|AE001864_5 conserved hypothetical protein [Deinococcus radiodurans R1]
2	TUBE A	F065050.dat	1803	807.423	2	1612.83	1612.83	0.125246	45.19	246	260	R	GVEVRVLDPGETTEL	-		1	1812.95	ech_dec-07_tubeA.3817.3817.2.dta	gi|15805048	gb|AAF09599.1|AE001864_5 conserved hypothetical protein [Deinococcus radiodurans R1]
2	TUBE A	F065050.dat	1952	563.937	3	1688.79	1688.79	-0.129086	47.48	39	53	R	SLGHSTFFLDDGTHR	L		0	1161.93	ech_dec-07_tubeA.2177.2177.3.dta	gi|15805048	gb|AAF09599.1|AE001864_5 conserved hypothetical protein [Deinococcus radiodurans R1]
2	TUBE A	F065050.dat	1312	699.394	2	1396.77	1396.77	0.891341	47.3	54	65	R	LLIEPFLEGNPR	C		0	2144.71	ech_dec-07_tubeA.4600.4600.2.dta	gi|15805048	gb|AAF09599.1|AE001864_5 conserved hypothetical protein [Deinococcus radiodurans R1]
2	TUBE A	F065050.dat	1500	743.861	2	1485.71	1485.71	0.804331	100.56	31	43	K	EVQLDIEENGGQR	F		0	1089.49	ech_dec-07_tubeA.1996.1996.2.dta	gi|15806264	gb|AAF10822.1|AE001972_12 hypothetical protein DR_1245 [Deinococcus radiodurans R1]
2	TUBE A	F065050.dat	1499	743.86	2	1485.71	1485.71	0.225482	67.96	31	43	K	EVQLDIEENGGQR	F		0	1091.03	ech_dec-07_tubeA.2000.2000.2.dta	gi|15806264	gb|AAF10822.1|AE001972_12 hypothetical protein DR_1245 [Deinococcus radiodurans R1]
2	TUBE A	F065050.dat	1395	718.39	2	1434.76	1434.76	0.38055	75.61	1	13	-	METALLTLDTLAK	Y	Oxidation (M) [1]	0	2004.49	ech_dec-07_tubeA.4267.4267.2.dta	gi|355154308	gb|ACO46080.2| conserved hypothetical protein [Deinococcus deserti VCD115]
2	TUBE A	F065050.dat	1359	710.392	2	1418.77	1418.77	0.412329	51.23	1	13	-	METALLTLDTLAK	Y		0	2189.86	ech_dec-07_tubeA.4713.4713.2.dta	gi|355154308	gb|ACO46080.2| conserved hypothetical protein [Deinococcus deserti VCD115]
2	TUBE A	F065050.dat	1360	710.392	2	1418.77	1418.77	0.835231	54.24	1	13	-	METALLTLDTLAK	Y		0	2191.48	ech_dec-07_tubeA.4717.4717.2.dta	gi|355154308	gb|ACO46080.2| conserved hypothetical protein [Deinococcus deserti VCD115]
2	TUBE A	F065050.dat	1394	718.389	2	1434.76	1434.76	0.199336	64.11	1	13	-	METALLTLDTLAK	Y	Oxidation (M) [1]	0	2003.31	ech_dec-07_tubeA.4264.4264.2.dta	gi|355154308	gb|ACO46080.2| conserved hypothetical protein [Deinococcus deserti VCD115]
2	TUBE A	F065050.dat	1577	760.36	2	1518.71	1518.71	-0.257456	53.57	87	100	K	VNVDDNPATSGQFR	V		0	1034.45	ech_dec-07_tubeA.1851.1851.2.dta	gi|15805968	gb|AAF10520.1|AE001947_3 thioredoxin [Deinococcus radiodurans R1]
2	TUBE A	F065050.dat	1576	760.36	2	1518.71	1518.71	-0.4945	49.4	87	100	K	VNVDDNPATSGQFR	V		0	1032.95	ech_dec-07_tubeA.1847.1847.2.dta	gi|15805968	gb|AAF10520.1|AE001947_3 thioredoxin [Deinococcus radiodurans R1]
2	TUBE A	F065050.dat	493	532.28	2	1062.55	1062.55	-3.77959	50.78	37	46	R	VIMASGLSNR	Q	Oxidation (M) [3]	0	1187.62	ech_dec-07_tubeA.2243.2243.2.dta	gi|124266534	gb|ABM94303.1| conserved hypothetical protein [Methylibium petroleiphilum PM1]
2	TUBE A	F065050.dat	361	487.269	2	972.524	972.524	0.0421583	47.06	353	360	R	LEIDTINR	K		0	1079.23	ech_dec-07_tubeA.1969.1969.2.dta	gi|298373224	gb|EFI17679.1| CBS domain protein [Bacteroidetes oral taxon 274 str. F0058]
2	TUBE A	F065050.dat	343	481.233	2	960.451	960.451	-0.213441	46.4	130	138	K	GDIGELDSR	E		0	1163.21	ech_dec-07_tubeA.2180.2180.2.dta	gi|239617573	gb|ACR79891.1| NUDIX hydrolase [Kosmotoga olearia TBF 19.5.1]
2	TUBE A	F065050.dat	345	481.233	2	960.451	960.451	-0.213441	42.19	130	138	K	GDIGELDSR	E		0	1225.98	ech_dec-07_tubeA.2342.2342.2.dta	gi|239617573	gb|ACR79891.1| NUDIX hydrolase [Kosmotoga olearia TBF 19.5.1]
Sample	Reference	.DAT file	MS/MS query	m/z observed	z	Mr (experimental)	Mr (calculated)	Error (ppm)	MASCOT score	Start	Stop	-1	Peptide sequence	+1	Modifications	Miss-cleavages	R.T.	Query title	Accession	Description
3	bande 8	F065049.dat	1047	633.328	2	1264.64	1264.64	0.730642	49.84	68	78	K	SPEGEELVIHR	G		0	819.432	ech_21-06-07_bd8.1339.1339.2.dta	gi|298351859	tpg|DAA06535.1| TPA_exp: single-stranded DNA-binding protein [Deinococcus radiodurans R1]
3	bande 8	F065049.dat	1511	761.899	2	1521.78	1521.79	-1.67829	78.74	1	13	-	MLQIEFITDLGAR	V	Oxidation (M) [1]	0	2361.63	ech_21-06-07_bd8.4799.4799.2.dta	gi|298351859	tpg|DAA06535.1| TPA_exp: single-stranded DNA-binding protein [Deinococcus radiodurans R1]
3	bande 8	F065049.dat	1578	784.902	2	1567.79	1567.79	0.76541	69.76	119	132	K	ADGDIEYVSLAIFR	G		0	2585.68	ech_21-06-07_bd8.5202.5202.2.dta	gi|298351859	tpg|DAA06535.1| TPA_exp: single-stranded DNA-binding protein [Deinococcus radiodurans R1]
3	bande 8	F065049.dat	1821	913.471	2	1824.93	1824.93	0.732633	88.5	117	132	R	EKADGDIEYVSLAIFR	G		1	2260.63	ech_21-06-07_bd8.4603.4603.2.dta	gi|298351859	tpg|DAA06535.1| TPA_exp: single-stranded DNA-binding protein [Deinococcus radiodurans R1]
3	bande 8	F065049.dat	1512	761.901	2	1521.79	1521.79	0.569068	75.99	1	13	-	MLQIEFITDLGAR	V	Oxidation (M) [1]	0	2364.09	ech_21-06-07_bd8.4805.4805.2.dta	gi|298351859	tpg|DAA06535.1| TPA_exp: single-stranded DNA-binding protein [Deinococcus radiodurans R1]
3	bande 8	F065049.dat	1577	784.901	2	1567.79	1567.79	-0.0127568	57.71	119	132	K	ADGDIEYVSLAIFR	G		0	2586.5	ech_21-06-07_bd8.5204.5204.2.dta	gi|298351859	tpg|DAA06535.1| TPA_exp: single-stranded DNA-binding protein [Deinococcus radiodurans R1]
3	bande 8	F065049.dat	1822	913.471	2	1824.93	1824.93	1.07237	45.21	117	132	R	EKADGDIEYVSLAIFR	G		1	2258.24	ech_21-06-07_bd8.4597.4597.2.dta	gi|298351859	tpg|DAA06535.1| TPA_exp: single-stranded DNA-binding protein [Deinococcus radiodurans R1]
3	bande 8	F065049.dat	1418	732.871	2	1463.73	1463.73	1.36364	57.71	73	86	K	GGDAVVVEGTLEYR	Q		0	1425.53	ech_21-06-07_bd8.2755.2755.2.dta	gi|37537915	gb|AEW67128.1| single-stranded DNA binding protein [Deinococcus radiodurans]
3	bande 8	F065049.dat	1635	808.893	2	1615.77	1615.77	1.05213	69.9	234	251	R	GAGNANSGYAAATPAAPR	T		0	660.246	ech_21-06-07_bd8.1002.1002.2.dta	gi|37537915	gb|AEW67128.1| single-stranded DNA binding protein [Deinococcus radiodurans]
3	bande 8	F065049.dat	1636	808.894	2	1615.77	1615.77	1.42347	52.66	234	251	R	GAGNANSGYAAATPAAPR	T		0	661.061	ech_21-06-07_bd8.1004.1004.2.dta	gi|37537915	gb|AEW67128.1| single-stranded DNA binding protein [Deinococcus radiodurans]
3	bande 8	F065049.dat	1298	699.394	2	1396.77	1396.77	1.50705	51.31	54	65	R	LLIEPFLEGNPR	C		0	2149.67	ech_21-06-07_bd8.4382.4382.2.dta	gi|15805048	gb|AAF09599.1|AE001864_5 conserved hypothetical protein [Deinococcus radiodurans R1]
3	bande 8	F065049.dat	1296	699.393	2	1396.77	1396.77	0.633604	49.57	54	65	R	LLIEPFLEGNPR	C		0	2151.27	ech_21-06-07_bd8.4385.4385.2.dta	gi|15805048	gb|AAF09599.1|AE001864_5 conserved hypothetical protein [Deinococcus radiodurans R1]
3	bande 8	F065049.dat	1450	743.861	2	1485.71	1485.71	0.804331	70.37	31	43	K	EVQLDIEENGGQR	F		0	1104.68	ech_21-06-07_bd8.2039.2039.2.dta	gi|15806264	gb|AAF10822.1|AE001972_12 hypothetical protein DR_1245 [Deinococcus radiodurans R1]
3	bande 8	F065049.dat	1449	743.86	2	1485.71	1485.71	-0.514907	62.32	31	43	K	EVQLDIEENGGQR	F		0	1103.56	ech_21-06-07_bd8.2036.2036.2.dta	gi|15806264	gb|AAF10822.1|AE001972_12 hypothetical protein DR_1245 [Deinococcus radiodurans R1]
3	bande 8	F065049.dat	1366	718.389	2	1434.76	1434.76	-0.386126	77.04	1	13	-	METALLTLDTLAK	Y	Oxidation (M) [1]	0	2010.81	ech_21-06-07_bd8.4090.4090.2.dta	gi|355154308	gb|ACO46080.2| conserved hypothetical protein [Deinococcus deserti VCD115]
3	bande 8	F065049.dat	1367	718.39	2	1434.76	1434.76	0.464188	64.36	1	13	-	METALLTLDTLAK	Y	Oxidation (M) [1]	0	2011.93	ech_21-06-07_bd8.4093.4093.2.dta	gi|355154308	gb|ACO46080.2| conserved hypothetical protein [Deinococcus deserti VCD115]
3	bande 8	F065049.dat	465	487.269	2	972.523	972.524	-0.780443	50.03	353	360	R	LEIDTINR	K		0	1082.27	ech_21-06-07_bd8.1986.1986.2.dta	gi|298373224	gb|EFI17679.1| CBS domain protein [Bacteroidetes oral taxon 274 str. F0058]
3	bande 8	F065049.dat	549	532.28	2	1062.55	1062.55	0.283282	46.44	207	216	K	FSPVSLGSNR	L		0	1416.66	ech_21-06-07_bd8.2736.2736.2.dta	gi|295134596	gb|ADF53076.1| RNA methyltransferase [Zunongwangia profunda SM-A87]
3	bande 8	F065049.dat	1218	673.365	2	1344.72	1344.71	1.86954	44.86	329	341	R	GVDSLDISIAEVK	N		0	3015.44	ech_21-06-07_bd8.5915.5915.2.dta	gi|358067121	gb|EHI56420.1| hypothetical protein HMPREF9333_00485 [Johnsonella ignava ATCC 51276]
3	bande 8	F065049.dat	550	532.809	2	1063.6	1063.6	-0.0582925	44.36	125	133	R	AISYLDKVR	I		1	861.541	ech_21-06-07_bd8.1448.1448.2.dta	gi|103487892	gb|ABF54120.1| ABC transporter related [Sphingopyxis alaskensis RB2256]
